# Supplementary material for: Open-circuit voltage improvement in tantalum-doped TiO2 nanocrystals
Source: Royal Society of Chemistry journal article supplement (doi:10.1039/c4cp01655f), 2014-01-01
Supplement: c4cp01655f1.pdf [file c4cp01655f1.pdf]

## Supporting Information

### **OPEN-CIRCUIT VOLTAGE IMPROVEMENT FROM TANTALUM DOPED TiO<sub>2</sub> NANOCRYSTALS**

*Feng Gu*<sup>\*ab</sup> *Wenjuan Huang*,<sup>a</sup> *Shufen Wang*,<sup>a</sup> *Xing Cheng*,<sup>a</sup> *Yanjie Hu*,<sup>\*a</sup> *Pooi See Lee*<sup>b</sup>

#### EXPERIMENTAL METHODS

*Particle preparation.* Tantalum-doped TiO<sub>2</sub> nanoparticles were prepared via a liquid-feed flame spray synthesis. The reactor has three rings for titanium/tantalum precursor, H<sub>2</sub>(fuel) and air(shield gas), respectively, from inside to out. There are 8 symmetrical pores (d=1mm) in the middle ring for H<sub>2</sub> flowing. The ethanol solution (0.4M) of titanium tetrabutoxide (98%, Lingfeng Chemical reagent Co.,Ltd., China) and tantalum chloride (99.7%, Sinopharm Chemical Reagent Co.Ltd, China) was sprayed out from the nozzle and ignited by a supported inverse H<sub>2</sub> /air diffusion flame (H<sub>2</sub>: 0.38 m<sup>3</sup> /h, air: 2.0 m<sup>3</sup>/h). The product stream was drawn from the combustion chamber by vacuum pump into powder collectors. The doping concentration was varied from 0-0.4% (with respect to Ti).

*Device assembly.* To prepare the DSSC working electrodes, 0.085 g of two kinds of ethyl cellulose (22 cps, 180~220 cps) were dispersed into 50 mL ethanol and stirred for 1 h. 0.22 g of Ta-doped TiO<sub>2</sub> nanoparticles and 1.5 mL terpinol were added in the mixture solution and stirred for 24 h. The mixture was dried at 70°C to obtain the viscous paste. Then the resulting paste was coated on FTO glass (15 Ω/square, Nippon Sheet Glass, Japan) using a doctor-blade method. The films were then sintered at 450°C for 30 min in air. The film were soaked in 0.5 mM N719 dye solution in a mixture of butylalcohol and acetonitrile (volume ratio, 1:1) and kept at room temperature for 24h to complete the sensitizer loading. The working electrodes (active area 0.25 cm<sup>2</sup>) were assembled and sealed with the counter electrodes made by thermal deposition of H<sub>2</sub>PtCl<sub>6</sub> on FTO glass to produce a sandwich-type cell. The electrolyte, 0.60M BMII(1-butyl-3-methylimidazolium iodide), 0.03M I<sub>2</sub>, 0.10M guanidinium thiocyanate, and 0.50M 4-tert-butylpyridine in acetonitrile, was introduced into the cell.

*Characterization.* Morphologies of the samples were observed by using a transmission electron microscope (TEM-100CXII) and scanning electron micrograph (Hitachi S-4800). X-Ray Diffraction (Rigaku D/max 2550 VB/PC diffract meter with Cu Kα radiation) was used to verify crystal phase. X-ray photoelectron spectra (XPS) measurements were carried out on an X-ray

photoelectron spectrometer (ESCALAB MK II) using Mg Ka (1253.6 eV) X-rays as the excitation source, with C 1s (284.6 eV) as the reference. The photocurrent and voltage of the DSSC devices were measured using a Newport solar simulator (91160A, Newport). The intensity of the lamp was adjusted using a Si reference cell for light intensity of 60 mW cm<sup>-2</sup>. Electrochemical impedance spectra were measured using a potentiostat (Versastat, Ametek). The EIS measurements were carried out in darkness at the open-circuit voltage and 5 mV of amplitude over the frequency range of 0.1 Hz-100 kHz. We have added it in the supporting information. The dye-loading-amount experiment was performed by desorbing a dye-loaded photoanode in 0.05M NaOH solution in 1:1 H<sub>2</sub>O/ethanol. A UV-vis spectrometer (Hewlett-Packard, Hayward, CA, USA) was used to measure the absorbance of the desorbing solution. By referring to the pre-established calibration curve, the dye-loading amount was determined. Mott-Schottky measurements were performed in 2M KCl at 10 kHz using a Solartron S1287 Electrochemical Interface and 255B Frequency Response Analyzer (Solartron Analytical, UK) at scan rate of 50 mVs<sup>-1</sup>, and photocurrent density and the photovoltage of the dye sensitized solar cells were measured in 0.1M Na<sub>2</sub>SO<sub>4</sub> solution using a CHI600C potentiostat at scan speed of 10 mVs<sup>-1</sup>.

a

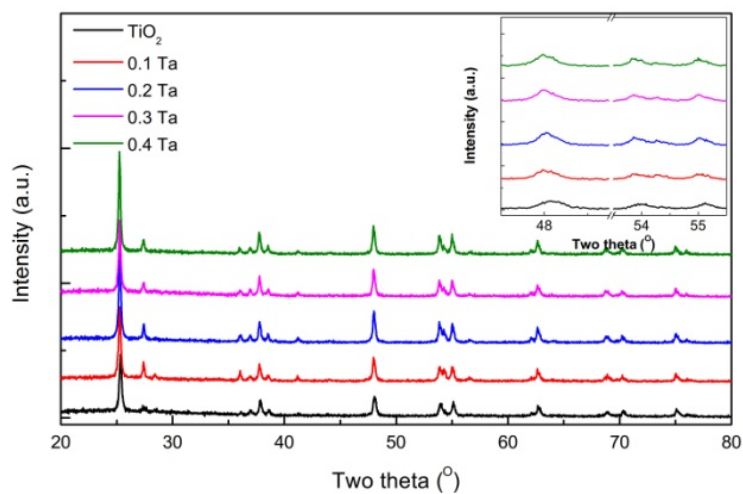

b

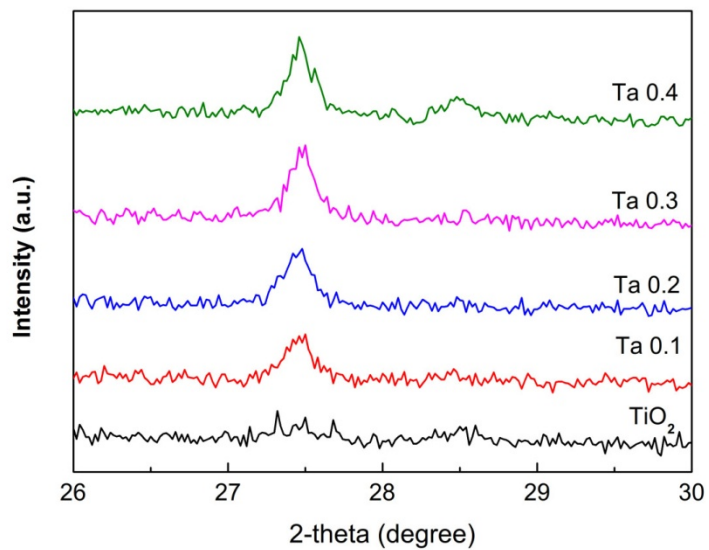

**Figure S1.** (a) XRD patterns of Ta-doped TiO<sub>2</sub> nanoparticles. (b) Details of XRD patterns in the range of 26-30°, showing the (110) diffraction peak of rutile TiO<sub>2</sub>.

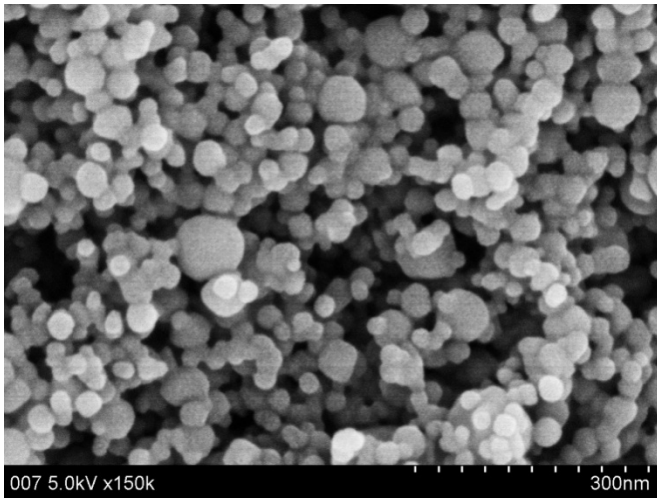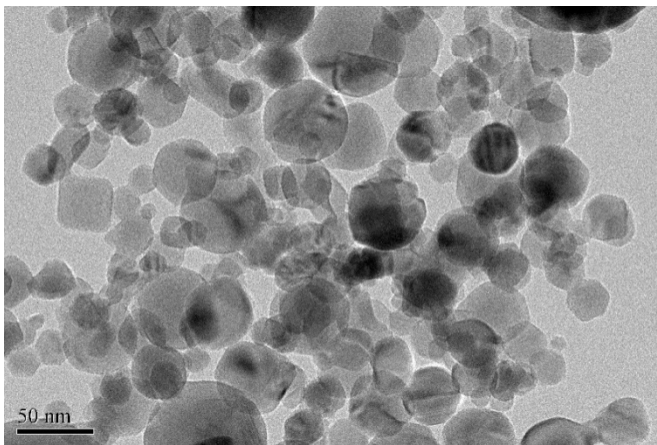

**Figure S2.** SEM and TEM images of  $\text{TiO}_2$  nanoparticles prepared by FSP.

**Table S1** Doping concentration estimated from XPS results.

| Sample                       | 0.2% Ta- $\text{TiO}_2$ | 0.3% Ta- $\text{TiO}_2$ | 0.4% Ta- $\text{TiO}_2$ |
|------------------------------|-------------------------|-------------------------|-------------------------|
| Doping concentration (at. %) | 0.1                     | 0.16                    | 0.23                    |

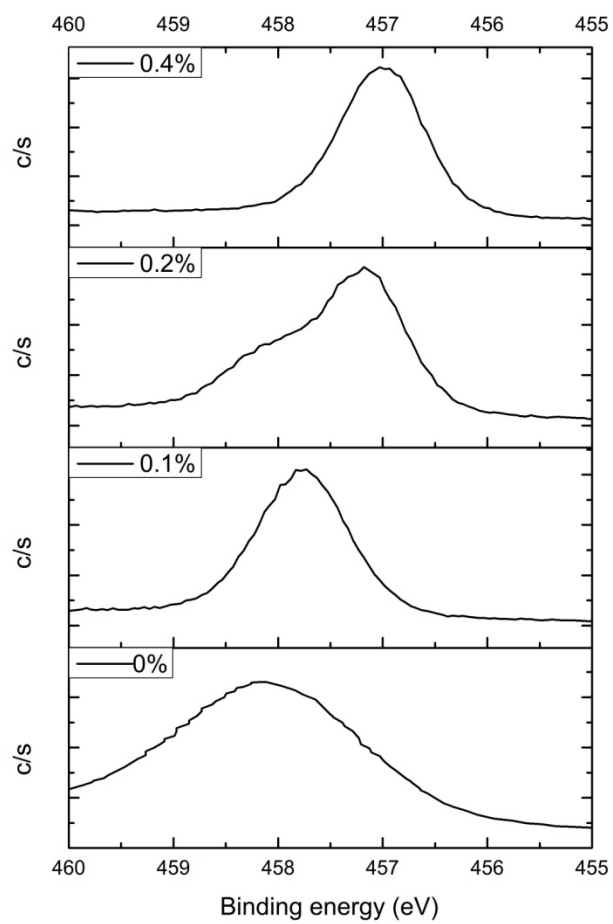

**Figure S3.** XPS survey spectra of Ti<sub>2p<sub>3/2</sub></sub>.

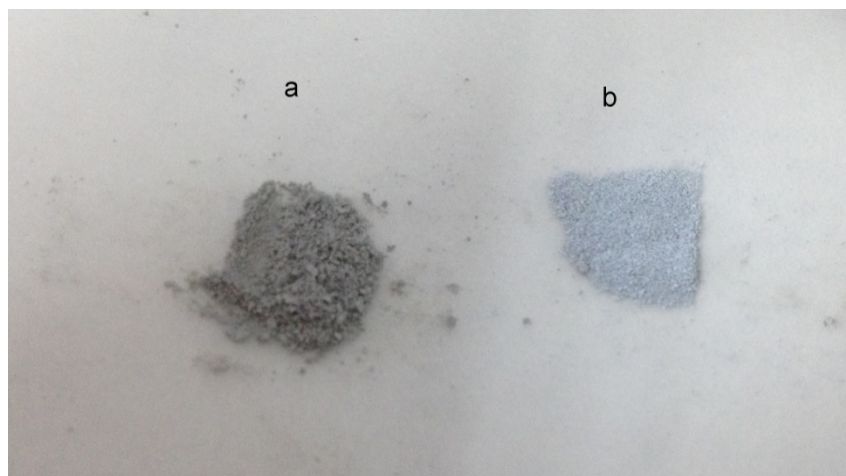

**Figure S4.** Photographs of doped powders under Ar (a) and air (b) heat treatment.
